# Supplementary material for: Honeycomb-like CuO/ZnO hybrid nanocatalysts prepared from solid waste generated in the organosilane industry
Source: Royal Society of Chemistry journal article supplement (doi:10.1039/c6ra11132g), 2016-01-01
Supplement: c6ra11132g1.pdf [file c6ra11132g1.pdf]

## Supporting Information for

### Honeycomb-like CuO/ZnO Hybrid Nanocatalysts Prepared from Solid Waste Generated in Organosilane Industry

Jing Li,<sup>a,b</sup> Hezhi Liu,<sup>a</sup> Yongjun Ji,<sup>a,\*</sup> Yu Zhang,<sup>a,b</sup>

Guangna Wang,<sup>a</sup> Yongxia Zhu,<sup>a</sup> Ziyi Zhong,<sup>c</sup> Xiao Hu<sup>c</sup> and Fabing Su<sup>a,\*</sup>

<sup>a</sup> State Key Laboratory of Multiphase Complex Systems, Institute of Process Engineering, Chinese Academy of Sciences, Beijing 100190, People's Republic of China

<sup>b</sup> University of Chinese Academy of Sciences, Beijing 100049, People's Republic of China

<sup>c</sup> Nanyang Environment & Water Research Institute (NEWRI), Nanyang Technological University, 1 Cleantech Loop, CleanTech One, Singapore 637141, Singapore

\*To whom correspondence should be addressed. E-mail address: yjji@ipe.ac.cn (Y. Ji), fbsu@ipe.ac.cn (F. Su), Tel.: +86-10-82544850, Fax: +86-10-82544851.

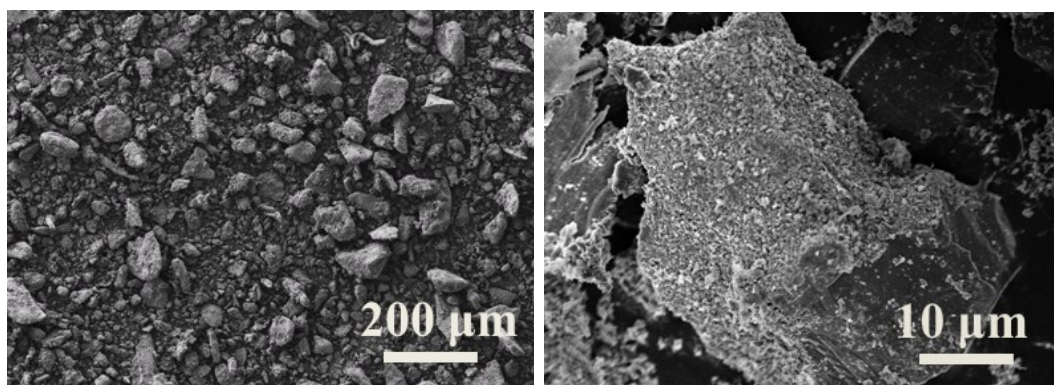

**Figure S1.** SEM images of waste contact mass.

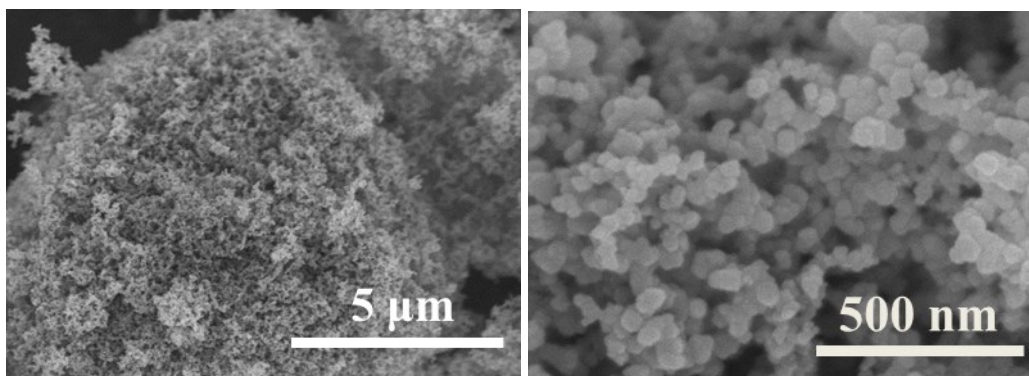

**Figure S2.** SEM images of CB.

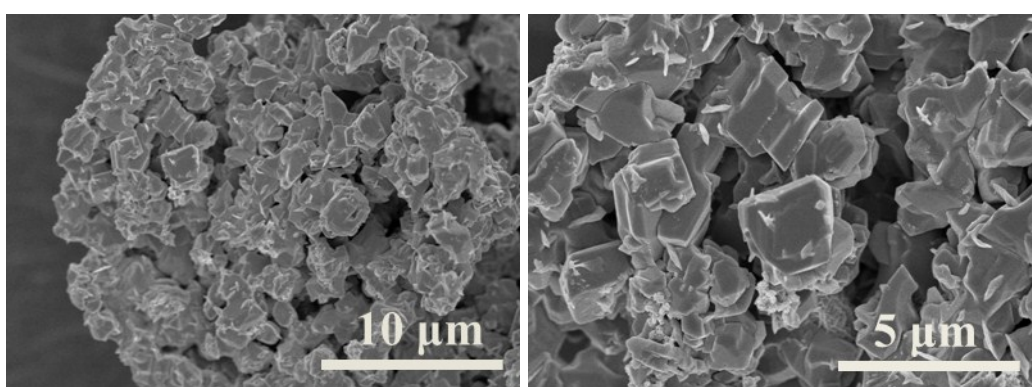

**Figure S3.** SEM images of CZ80/20 prepared with 67 wt% CB using  $\text{Cu}(\text{NH}_3)_4\text{NO}_3$  as precursor.

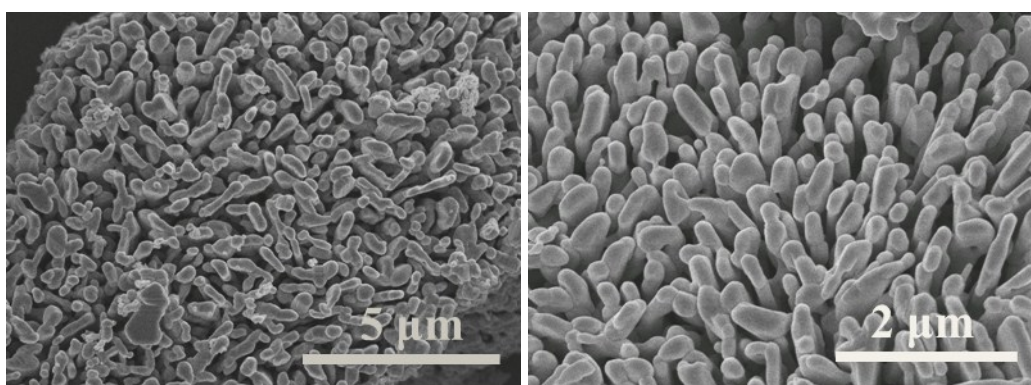

**Figure S4.** SEM images of CZ80/20 prepared with 67 wt% CB using  $\text{Cu}(\text{NH}_3)_4\text{CO}_3$  as precursor.

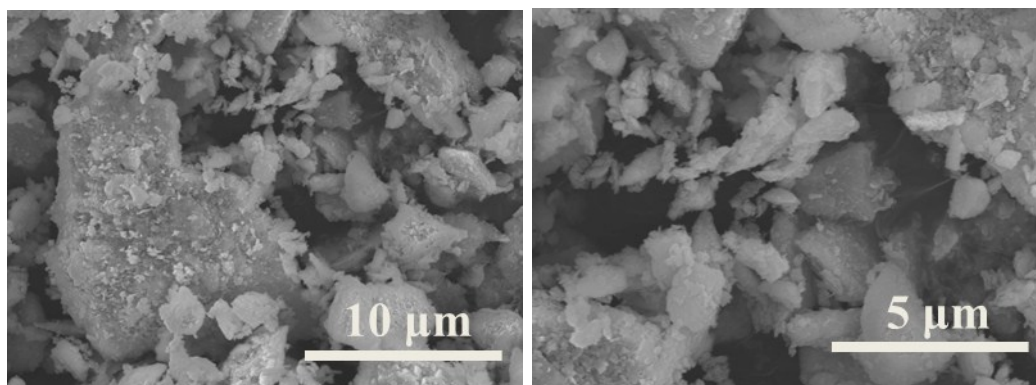

**Figure S5.** SEM images of the commercial Cu-Cu<sub>2</sub>O-CuO sample.
